# Supplementary material
Source: Springer Nature journal article supplement (https://www.springermedizin.de/resource/supplementary/13063_2007_217_MOESM1_ESM.pdf/9622390)

Consecutive attenders >17 years of age; not already receiving/received intervention; not been screened in previous 2 weeks; not requiring urgent hospital referral

Screening with GHQ; if score>5

Resident for the subsequent 12 months in Goa and speaking Konkani/Marathi/English and not suffering from speech/hearing/cognitive impairment

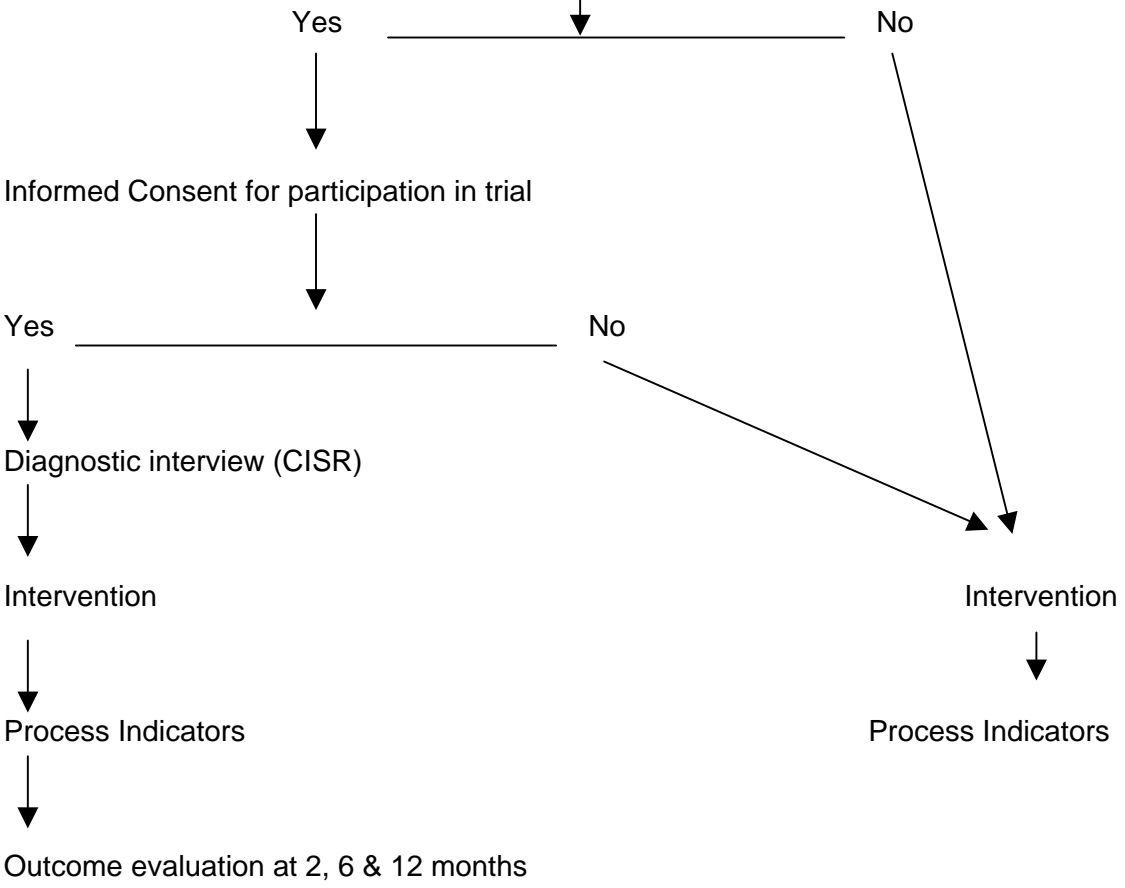

Supplement: MOESM1 [file 9622390]
